# Supplementary material for: Biochemical and toxicological effects of methanolic extract of Asparagus africanus Lam in Sprague-Dawley rats
Source: PeerJ. 2020 Jun 22;8:e9138. doi: 10.7717/peerj.9138 (PMC7316077; doi:10.7717/peerj.9138)
Supplement: Supplemental Information 1 [file peerj-08-9138-s001.xlsx]

## Sheet: Sheet1
METHANOLIC TOXICITY
					CLINICAL CHEMISTRY
				ALT U/L	ALP U/L	AST U/L	Cr mmol/L	Urea mmol/L	Uric acid mmol/L	Total protein g/L																											GRAPHS&STATS
			Control DW	64	166	120	22	7	63	65		GROUP	ALT U/L	ALP U/L	AST U/L	Cr mmol/L	Urea mmol/L	Uric acid mmol/L	Total protein g/L							METHANOLIC TOXICITY
				63	160	159	23	7.4	195	54		Control DW	64	166	120	22	7	63	65
				63	148	115	23	6.7	89	56			63	160	159	23	7.4	195	54								Initial body weight(g)	Final body weight(g)		%of weight gain							ALT U/L		Group	ALT
			Mean	63.3333	158	131.333	22.6667	7.03333	115.667	58.3333			63	148	115	23	6.7	89	56								190.90±5.75	239.65±21.35		25.55						Control DW	64		control	63.33
			SEM	0.57735	9.16515	24.0901	0.57735	0.351188	69.9238	5.85947		5mg/kgBW	68	165	124	22	7	63	57																		63		5mg/kgbw	68
			5mg/kgBW	68	165	124	22	7	63	57			77	141	300	24	7.1	173	57								195.47±9.84	228.59±17.73		16.97							63		50mg/kgbw	71.66
				77	141	300	24	7.1	173	57			55	163	92	22	7.2	52	55								204.65±2.97	241.50±6.94		17.67						Mean	63.3333		300mg/kgbw	69.33
				72.5	153	212	23	7.05	118	57		50mg/kbw	78	193	192	23	7.4	65	59								211.30±2.97	246.75±11.12		17.37						SEM	0.57735		2000mg/kgbw	57.66
	SEM		Mean	6.36396	16.9706	124.451	1.41421	0.0707107	77.7817	0			58	162	126	22	6.1	54	58								204.27±5.19	243.18±12.87		19.63						5mg/kgBW	68
			50mg/kbw	78	193	192	23	7.4	65	59			79	274	114	22	7	67	56											Doses	Mean body weight increment(g)	%of weight gain					77
				58	162	126	22	6.1	54	58		300mg/kgbw	80	185	201	24	6.5	101	59											Control 5ml/kgBW	48.75	25.55					72.5
				79	274	114	22	7	67	56			62	145	91	23	5.9	53	56																	Mean	6.36396
			Mean	71.6667	209.667	144	22.3333	6.83333	62	57.6667			66	177	101	22	7.2	44	63											5mg/kgBW	33.12	16.97				50mg/kbw	78
			SEM	11.8462	57.8302	42	0.57735	0.665833	7	1.52753		2000mg/kgbw	56	166	79	21	6.3	40	59											50mg/kgBW	36.28	17.67					58
			300mg/kgbw	80	185	201	24	6.5	101	59			68	172	98	22	6.7	61	60											300mg/kgBW	35.45	17.37					79
				62	145	91	23	5.9	53	56			49	179	135	24	5.8	59	56											2000mg/kgBW	39.91	19.63				Mean	71.6667
				66	177	101	22	7.2	44	63																										SEM	11.8462
			Mean	69.3333	169	131	23	6.53333	66	59.3333																										300mg/kgbw	80
			SEM	9.45163	21.166	60.8276	1	0.650641	30.6431	3.51188																											62
			2000mg/kgbw	56	166	79	21	6.3	40	59																											66
				68	172	98	22	6.7	61	60																										Mean	69.3333
				49	179	135	24	5.8	59	56																										SEM	9.45163
			Mean	57.6667	172.333	104	22.3333	6.26667	53.3333	58.3333																										2000mg/kgbw	56
			SEM	9.60902	6.50641	28.4781	1.52753	0.450925	11.5902	2.08167																											68
																																					49
																																				Mean	57.6667
																																				SEM	9.60902
		METHANOLIC		HAEMATOLOGICAL PARAMETERS /TOXICITY
				Dose in mg	HGB(g/L)	HCT(L/L)	RBC(1012/L)	MCV(fl)	MCH(pg)	MCHC(g/L)	RDW (%)	WBC(109/L)	Platelet(109/L)				TREATMENT	HGB(g/L)	HCT(L/L)	RBC(1012/L)	MCV(fl)	MCH(pg)	MCHC(g/L)	RDW (%)	WBC(109/L)	Platelet(109/L)
				Control DW	138	0.43	6.94	63	19.9	304	12.2	10.1	756				Control DW
					136	0.45	6.93	65	19.7	303	12.3	10.2	755				5mg/kgBW
					137	0.45	6.92	65	19.8	304	12.5	10	757				50mg/kbw												HGB(g/L)							HGB(g/L)			Anova: Single Factor
				M	137	0.443333	6.93	64.3333	19.8	303.667	12.3333	10.1	756				300mg/kgbw																			138
				SD	1	0.011547	0.01	1.1547	0.1	0.57735	0.152753	0.1	1				2000mg/kgbw												Group	control	5mg/kgbw	50mg/kgbw	300mg/kgbw	2000mg/kgbw		136			SUMMARY
				5mg/kgBW	136	0.44	6.72	65	20.2	312	12.3	11.2	565																	138	136	138	141	138		137			Groups	Count	Sum	Average	Variance			TREATMENT	HGB(g/L)
					138	0.44	6.72	65	20.2	312	12.3	11.2	565				SEM												HGB(g/L)	136	138	145	146	131					control	3	411	137	1			control	137
					136	0.43	6.55	64	19.2	310	12	11	564				TREATMENT	HGB(g/L)	HCT(L/L)	RBC(1012/L)	MCV(fl)	MCH(pg)	MCHC(g/L)	RDW (%)	WBC(109/L)	Platelet(109/L)				137	136	136	143	127					5mg/kgbw	3	410	136.667	1.33333			5mg/kgbw	136.667
				M	136.667	0.436667	6.66333	64.6667	19.8667	311.333	12.2	11.1333	564.667				Control DW	137	0.443	6.93	64.33	19.8	303.66	12.33	10.1	756										136			50mg/kgbw	3	419	139.667	22.3333			50mg/kgbw	139.667
				SD	1.1547	0.0057735	0.0981495	0.57735	0.57735	1.1547	0.173205	0.11547	0.57735				5mg/kgBW	136.66	0.436	6.66	64.66	19.86	311.33	12.2	11.13	564.66										138			300mg/kgbw	3	430	143.333	6.33333			300mg/kgbw	143.333
				50mg/kbw	138	0.44	6.8	62	19.4	318	11.5	12.5	1022				50mg/kbw	139.66	0.44	7.02	62	19.6	318.33	11.73	12	977.66					P=0.02<0.05					136			2000mg/kgbw	3	396	132	31			2000mg/kgbw	132
					145	0.45	7.39	61	19.6	322	12.1	11.2	877				300mg/kgbw	143.33	0.44	7.44	63.66	19.33	313.66	12.5	11.23	1014					significant
					136	0.43	6.86	63	19.8	315	11.6	12.3	1034				2000mg/kgbw	132	0.43	6.71	61	19.4	312	11.6	8.33	817.66
				M	139.667	0.44	7.01667	62	19.6	318.333	11.7333	12	977.667																							138			ANOVA
				SD	4.72582	0.01	0.324705	1	0.2	3.51188	0.321455	0.7	87.3861																							145			Source of Variation	SS	df	MS	F	P-value	F crit
				300mg/kgbw	141	0.42	7.44	65	19.5	314	12.5	11.4	1016																							136			Between Groups	208.933	4	52.2333	4.21237	0.0296543	3.47805
					146	0.44	7.48	64	19.2	315	12.3	11.2	1012																										Within Groups	124	10	12.4
					143	0.46	7.41	62	19.3	312	12.7	11.1	1014
				M	143.333	0.44	7.44333	63.6667	19.3333	313.667	12.5	11.2333	1014																							141			Total	332.933	14
				SD	2.51661	0.02	0.0351188	1.52753	0.152753	1.52753	0.2	0.152753	2																							146
				2000mg/kgbw	138	0.44	7.31	61	18.9	311	11.9	8.5	997																							143
					131	0.42	6.32	59	19.8	314	10.9	8.4	750
					127	0.41	6.5	63	19.5	311	12	8.1	706
				M	132	0.423333	6.71	61	19.4	312	11.6	8.33333	817.667																							138
				SD	5.56776	0.0152753	0.527352	2	0.458258	1.73205	0.608276	0.208167	156.858																							131
																																				127
			BODY WEIGHT
			Treatment	Control(DW)	5mg/kgBW	50mg/kgBW	300mg/kgBW	2000mg/kgBW			Treatment	Control(DW)	5mg/kgBW	50mg/kgBW	300mg/kgBW	2000mg/kgBW			Treatment	initial Wt	Final Wt
				188.6	202.09	207.95	201.47	205.25				262.73	236.43	241.34	244.32	258.05			Control(DW)	190.9	239.65
				197.45	200.16	203.82	224.8	208.91				235.65	241.07	234.64	237.05	235.67			5mg/kgBW	195.47	228.6
				186.66	184.16	202.18	207.65	198.66				220.58	208.29	248.52	258.9	235.84			50mg/kgBW	204.65	241.5
			Initial weight	190.903	195.47	204.65	211.307	204.273			Final weight	239.653	228.597	241.5	246.757	243.187			300mg/kgBW	211.31	246.76
			Std	5.75196	9.84217	2.9732	12.0872	5.19433			Std	21.3583	17.7385	6.94138	11.1269	12.8723			2000mg/kgBW	204.27	243.19
			Mean±SEM	190.90±5.75	195.47±9.84	204.65±2.97	211.31±12.09	204.27±5.19			Mean±SEM	239.65±21.36	228.60±17.74	241.5±6.94	246.76±11.13	243.19±12.87
																																													TOTALCHOLESTEROL				TCmmol/L
																																															GROOUP	control	5mg
																																																1.5	1.2
																																									Average	Variance					TCmmol/L	1.5	1.5
																																									0.5	0.03						1.4	1.4
																																									0.866667	0.223333
																																									0.466667	0.0133333
																																									0.533333	0.0233333
																																									0.566667	0.0133333							P=0.57˃0.05
																																																	Not significance
																																									MS	F	P-value	F crit
																																									0.0776667	1.28022	0.340723	3.47805
																																									0.0606667
AQUEOUS TOXICITY
						SD
						M±SD
						5mg/kgbw	117	0.38	5.95	64	19.7	306	13.5	4.7	834
						M
						SD
						M±SD
						50mg/kgbw	134	0.42	6.6	64	20.3	318	12.4	13.1	1348
							134	0.43	7.05	61	19	312	13.3	13	1044
						M
						SD
						M±SD
						300mg/kgbw
							132	0.42	6.67	64	19.9	314	13.1	12.2	1352
							137	0.44	7.08	62	19.4	314	14.5	13.4	1070
						M
						SD
						M±SD
						2000mg/kgbw	141	0.45	7.32	62	19.3	313	12.2	17.5	1183
							146	0.47	7.62	62	19.2	310	11.8	10.1	1075
							145	0.46	7.28	63	19.9	317	14.8	18	783
						M
						SD
						M±SD
				BLOOD DIFFERENTIAL COUNT					(%)	IN PREGNANTS RATS
						Dose in mg	Neutrophil	Lymphocyte	Monocyte	Eosinophil	Basophil	ImmatureGranulocyte
						Contrl DW
							11	87.8	0.5	0.5	0.2	0
							29.5	69.9	0.3	0.2	0.1	0
						M
						SD
						M±SD
						5mg/kgbw	33.9	65.7	0.2	0.2	0	0
						M
						SD
						M±SD
						50mg/kgbw	28.4	70.9	0.4	0.2	0.1	0
							27.7	70.5	0.5	1.1	0.2	0
						M
						SD
						M±SD
						300mg/kgbw
							27.1	72.2	0.3	0.3	0.1	0
							32.4	66.1	0.7	0.7	0.1	0
						M
						SD
						M±SD
						2000mg/kgbw	39.4	59.8	0.6	0.1	0.1	0
							16.6	82.4	0.3	0.6	0.1	0
							33.9	65.4	0.3	0.3	0.1	0
						M
						SD
						M±SD
[truncated: 30 more columns]
